# Supplementary material for: Increase of glandular epithelial cell clusters by an external volume expansion device promotes adipose tissue regeneration by recruiting macrophages
Source: Oxford University Press journal article supplement (doi:10.1042/bsr20181776), 2019-02-01

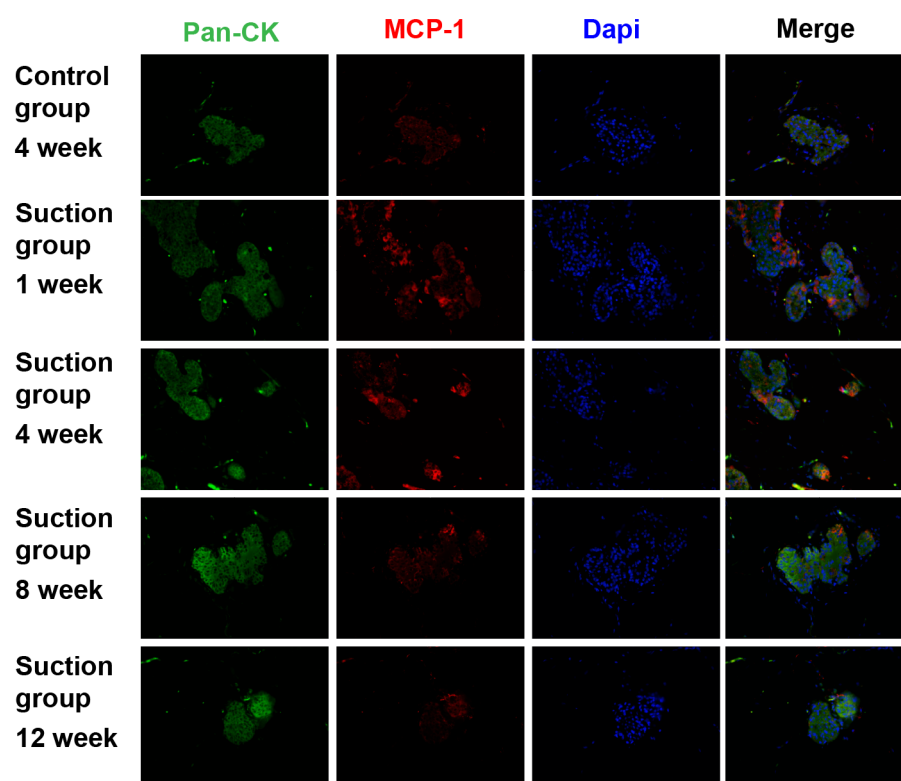

Supplement: bsr-2018-1776_supp.pdf [file bsr-2018-1776_supp.pdf]
